# Supplementary material for: The OsJAZ1 degron modulates jasmonate signaling sensitivity during rice development
Source: Oxford University Press journal article supplement (doi:10.1242/dev.173419), 2019-01-31
Supplement: dev173419supp.pdf [file dev173419supp.pdf]

## Supplementary files

### SUPPLEMENTARY FIGURES

|         |   |                                                               |
|---------|---|---------------------------------------------------------------|
| AtJAZ9  | 1 | MERDFLG-----LSDKQYLSNNVKHEVNDDAVEE                            |
| OsJAZ1  | 1 | -----                                                         |
| OsJAZ2  | 1 | -----                                                         |
| OsJAZ3  | 1 | MERDFLGAIWRKEEAAGKPEEHSVSRDADYRGGGGG-ASAAMQWQFPATKVGAAASSAFMS |
| OsJAZ4  | 1 | MERDFLGAI GKDEEQRRHAEER--KESDYFGAGGGAAAAAMDWSF-----ASRAALMS   |
| OsJAZ5  | 1 | -----MSTRAPVE                                                 |
| OsJAZ6  | 1 | -----M                                                        |
| OsJAZ7  | 1 | -----MA                                                       |
| OsJAZ8  | 1 | -----MA                                                       |
| OsJAZ9  | 1 | -----                                                         |
| OsJAZ10 | 1 | -----                                                         |
| OsJAZ11 | 1 | -----MAGSSEQQ                                                 |
| OsJAZ12 | 1 | -----                                                         |
| OsJAZ13 | 1 | -----                                                         |
| OsJAZ14 | 1 | -----                                                         |
| OsJAZ15 | 1 | -----MDAVGA                                                   |

#### CMID

|         |    |                                                                                                                                                                                                         |
|---------|----|---------------------------------------------------------------------------------------------------------------------------------------------------------------------------------------------------------|
| AtJAZ9  | 30 | RGLSTKAAREWGSKVFA <sup>TS</sup> SS <sup>FP</sup> SSDFQEAKAFPGAYQWG-----SV                                                                                                                               |
| OsJAZ1  | 1  | -----MDLLEK <sup>NI</sup> KKG <sup>GE</sup> VEEE <sup>V</sup> ARKGEERK-----EE                                                                                                                           |
| OsJAZ2  | 1  | MAEERRDD <sup>GG</sup> DVEVELS <sup>IR</sup> LR <sup>TD</sup> DD <sup>TS</sup> AD <sup>PA</sup> PAT-----V <sup>RA</sup>                                                                                 |
| OsJAZ3  | 60 | FRSSAAAAREEDPKEAAV <sup>DR</sup> FS <sup>LS</sup> G <sup>IR</sup> PP <sup>PR</sup> PS <sup>PG</sup> DA <sup>FD</sup> GAAAMK <sup>QR</sup> Q <sup>FG</sup> FN <sup>GR</sup> Q <sup>QY</sup> AA           |
| OsJAZ4  | 52 | FRSSSAAA <sup>AA</sup> AREETRE <sup>AF</sup> PH <sup>FS</sup> AL <sup>DG</sup> AK <sup>MQ</sup> Q <sup>AS</sup> H <sup>VL</sup> AR <sup>KS</sup> FG <sup>AE</sup> SH <sup>GI</sup> P---QY <sup>AA</sup> |
| OsJAZ5  | 9  | LDFLGLRAA <sup>AD</sup> ADD <sup>EH</sup> AK <sup>SG</sup> SS <sup>AS</sup> SSSS <sup>IR</sup> -----CM                                                                                                  |
| OsJAZ6  | 2  | ASAK----S <sup>ER</sup> GSS <sup>SF</sup> AM <sup>AC</sup> SL <sup>SR</sup> Y <sup>VR</sup> QNGAAAGELG-----L <sup>GI</sup>                                                                              |
| OsJAZ7  | 3  | ASARPVGV <sup>GR</sup> -AT <sup>SF</sup> AM <sup>AC</sup> SL <sup>SR</sup> Y <sup>VR</sup> QNGAAAAELG-----L <sup>GI</sup>                                                                               |
| OsJAZ8  | 3  | GRATATATA <sup>CK</sup> DRS <sup>SF</sup> AV <sup>TC</sup> SL <sup>SL</sup> Q <sup>FL</sup> KE <sup>KK</sup> GGGG <sup>GL</sup> Q <sup>GL</sup> GL <sup>LR</sup> PA-----PA <sup>AP</sup> PA             |
| OsJAZ9  | 1  | MAST----D <sup>PM</sup> TR <sup>RF</sup> AV <sup>AC</sup> GL <sup>SL</sup> Q <sup>Y</sup> V <sup>KA</sup> NSSQP-----ST                                                                                  |
| OsJAZ10 | 1  | MAME----C <sup>KS</sup> R- <sup>RF</sup> AM <sup>AC</sup> GL <sup>SL</sup> Q <sup>Y</sup> V <sup>RA</sup> E <sup>Q</sup> KMA-----A <sup>AA</sup>                                                        |
| OsJAZ11 | 9  | LVANAAAT <sup>TV</sup> AG <sup>NS</sup> SR <sup>FA</sup> MT <sup>CG</sup> LR <sup>QY</sup> M <sup>KE</sup> HSG <sup>NS</sup> GGG <sup>GL</sup> PA <sup>VT</sup> TAMS-----LMT <sup>GA</sup>              |
| OsJAZ12 | 1  | -----MA <sup>AG</sup> SS <sup>SF</sup> AM <sup>TC</sup> GL <sup>SL</sup> Q <sup>Y</sup> M <sup>RE</sup> R <sup>ER</sup> Q <sup>QP</sup> Q-----PP <sup>VT</sup> VL-----E <sup>AA</sup>                   |
| OsJAZ13 | 1  | MAAE-----A <sup>AT</sup> SR <sup>FA</sup> AA <sup>CG</sup> AL <sup>SL</sup> Q <sup>Y</sup> V <sup>RA</sup> AD <sup>NV</sup> H-----R <sup>AA</sup>                                                       |
| OsJAZ14 | 1  | MAVSDHHC <sup>GG</sup> GR <sup>SW</sup> RF <sup>AM</sup> AC <sup>GL</sup> SL <sup>RC</sup> V <sup>KA</sup> EA-----A <sup>AA</sup>                                                                       |
| OsJAZ15 | 7  | AGGGAMLPA <sup>AA</sup> RR <sup>GQ</sup> PP <sup>QP</sup> CM <sup>TT</sup> TA <sup>PE</sup> QQA <sup>AG</sup> GA <sup>VI</sup> WP-----A <sup>AA</sup>                                                   |

|         |     |                                                                                                                                                                                                                                     |
|---------|-----|-------------------------------------------------------------------------------------------------------------------------------------------------------------------------------------------------------------------------------------|
| AtJAZ9  | 73  | S <sup>AN</sup> V <sup>FR</sup> R-----CQ <sup>FG</sup> GA                                                                                                                                                                           |
| OsJAZ1  | 30  | EVVVEEK-----SH <sup>QQ</sup>                                                                                                                                                                                                        |
| OsJAZ2  | 40  | E <sup>ARR</sup> N-----                                                                                                                                                                                                             |
| OsJAZ3  | 120 | AAQHGHREQGVDSYGVAAPH <sup>FP</sup> SP <sup>SP</sup> SP <sup>PR</sup> HP <sup>VP</sup> FG <sup>HAN</sup> P <sup>ML</sup> R <sup>VH</sup> SL <sup>PN</sup> V----AG <sup>GS</sup> P                                                    |
| OsJAZ4  | 109 | AAAVHCA <sup>HR</sup> G <sup>QP</sup> PH <sup>VL</sup> NG <sup>AR</sup> VI <sup>PA</sup> SS <sup>P</sup> -----F <sup>NP</sup> N <sup>NP</sup> M <sup>FR</sup> V <sup>QS</sup> SP <sup>NL</sup> PN <sup>AV</sup> GAG <sup>GG</sup> A |
| OsJAZ5  | 43  | ETS <sup>AI</sup> AR-----IG <sup>PH</sup>                                                                                                                                                                                           |
| OsJAZ6  | 40  | R <sup>EE</sup> DAN-----K <sup>G</sup> KET                                                                                                                                                                                          |
| OsJAZ7  | 44  | R <sup>GE</sup> EAP <sup>RA</sup> AP <sup>AT</sup> MS <sup>LL</sup> P-----GE <sup>AE</sup> R <sup>KK</sup> ET                                                                                                                       |
| OsJAZ8  | 57  | AG <sup>AG</sup> AF <sup>RP</sup> PP <sup>TT</sup> M <sup>N</sup> LS <sup>GL</sup> DA-----PA <sup>VE</sup> VE <sup>PN</sup> T                                                                                                       |
| OsJAZ9  | 32  | AA <sup>PV</sup> AQ <sup>G</sup> -----V <sup>SG</sup> L                                                                                                                                                                             |
| OsJAZ10 | 31  | ACA <sup>IP</sup> AR-----AV <sup>TT</sup>                                                                                                                                                                                           |
| OsJAZ11 | 63  | DA <sup>EE</sup> EAP-----E <sup>VR</sup> K <sup>T</sup>                                                                                                                                                                             |
| OsJAZ12 | 37  | VA <sup>EE</sup> EEEE-----E <sup>D</sup> ART                                                                                                                                                                                        |
| OsJAZ13 | 32  | RTA <sup>AA</sup> AA-----AV <sup>RP</sup>                                                                                                                                                                                           |
| OsJAZ14 | 35  | AA <sup>NC</sup> RHR-----HH <sup>PT</sup>                                                                                                                                                                                           |
| OsJAZ15 | 49  | AA <sup>E</sup> KE <sup>KM</sup> V <sup>D</sup> ART <sup>MQ</sup> L <sup>FP</sup> TR-----SA <sup>DG</sup> V                                                                                                                         |

#### TIFY

|         |     |                                                                                                                                                                                                                                                                                          |
|---------|-----|------------------------------------------------------------------------------------------------------------------------------------------------------------------------------------------------------------------------------------------------------------------------------------------|
| AtJAZ9  | 87  | FQ <sup>NAT</sup> PL <sup>LL</sup> LG <sup>SV</sup> LP <sup>TH</sup> PS <sup>LV</sup> PR <sup>VAS</sup> G <sup>SS</sup> P <sup>OLT</sup> IF <sup>Y</sup> GG <sup>TIS</sup> V <sup>EN</sup> IS--P <sup>KA</sup> QA <sup>IM</sup> L                                                        |
| OsJAZ1  | 41  | QQ <sup>Q</sup> Q <sup>EE</sup> EL <sup>V</sup> GL <sup>SL</sup> AG <sup>GR</sup> PK <sup>VF</sup> MP <sup>SS</sup> PP <sup>PN</sup> PS <sup>OLT</sup> IF <sup>Y</sup> GG <sup>SV</sup> CV <sup>ES</sup> VE--P <sup>KA</sup> QA <sup>IM</sup> L                                          |
| OsJAZ2  | 45  | -----LT <sup>IF</sup> Y <sup>NG</sup> RM <sup>CA</sup> V <sup>N</sup> T-----E <sup>L</sup> -QART <sup>I</sup>                                                                                                                                                                            |
| OsJAZ3  | 175 | Y <sup>R</sup> N <sup>Q</sup> S <sup>F</sup> S <sup>V</sup> G <sup>NS</sup> V <sup>AG</sup> ST <sup>V</sup> GV <sup>YG</sup> GP <sup>RD</sup> L <sup>QN</sup> PK <sup>VT</sup> OM <sup>TIF</sup> Y <sup>D</sup> GL <sup>VN</sup> V <sup>FN</sup> IP--VE <sup>KA</sup> Q <sup>EL</sup> ML |
| OsJAZ4  | 162 | FK <sup>QP</sup> EF <sup>AM</sup> GN <sup>AV</sup> AG <sup>ST</sup> VG <sup>Y</sup> G--TR <sup>DM</sup> PK <sup>AK</sup> AA <sup>Q</sup> L <sup>TIF</sup> Y <sup>GS</sup> V <sup>N</sup> V <sup>FN</sup> NVS--P <sup>KA</sup> Q <sup>EL</sup> ML                                         |
| OsJAZ5  | 54  | IL <sup>RR</sup> VI <sup>AA</sup> AG <sup>PP</sup> PP <sup>PT</sup> AP <sup>VP</sup> PE <sup>EM</sup> PG <sup>AA</sup> AA <sup>AP</sup> MT <sup>IF</sup> Y <sup>NG</sup> SV <sup>AV</sup> FD <sup>V</sup> SH--P <sup>KA</sup> E <sup>AI</sup> MR                                         |
| OsJAZ6  | 52  | ME <sup>LF</sup> P <sup>Q</sup> NS <sup>GF</sup> G--SE <sup>AA</sup> AV <sup>KE</sup> TP <sup>D</sup> ARE <sup>QE</sup> --K <sup>RO</sup> L <sup>TIF</sup> Y <sup>G</sup> KK <sup>V</sup> LV <sup>FD</sup> FP--AE <sup>KA</sup> K <sup>DL</sup> MQ                                       |
| OsJAZ7  | 71  | ME <sup>LF</sup> P <sup>Q</sup> S <sup>AG</sup> FG <sup>QD</sup> AIT <sup>ADS</sup> A <sup>AD</sup> ARE <sup>QE</sup> PE <sup>K</sup> R <sup>OLT</sup> IF <sup>Y</sup> GK <sup>V</sup> LV <sup>FN</sup> FP--A <sup>KA</sup> K <sup>GL</sup> MQ                                           |
| OsJAZ8  | 88  | AETA <sup>AD</sup> EL <sup>PL</sup> IK <sup>AP</sup> AD <sup>Q</sup> Q <sup>SD</sup> ESA <sup>EA</sup> AGE <sup>KA</sup> Q <sup>OLT</sup> IF <sup>Y</sup> GK <sup>V</sup> V <sup>FN</sup> FP--ST <sup>KV</sup> K <sup>DL</sup> LQ                                                        |
| OsJAZ9  | 43  | MA <sup>AAAA</sup> AA <sup>AP</sup> V <sup>V</sup> Q <sup>EP</sup> -----G <sup>CE</sup> VD <sup>GG</sup> Q <sup>ET</sup> IF <sup>Y</sup> CK <sup>V</sup> V <sup>V</sup> LD <sup>R</sup> CT--PAMA <sup>E</sup> EL <sup>MR</sup>                                                           |
| OsJAZ10 | 42  | L <sup>SL</sup> MP <sup>GA</sup> EV <sup>V</sup> VE <sup>EE</sup> ER <sup>EV</sup> G <sup>EE</sup> EAG <sup>PAT</sup> APA <sup>EL</sup> T <sup>IF</sup> Y <sup>G</sup> GR <sup>M</sup> V <sup>FD</sup> FP--A <sup>KA</sup> E <sup>V</sup> MR                                             |
| OsJAZ11 | 75  | ME <sup>LF</sup> P <sup>Q</sup> Q-----AG <sup>TL</sup> K <sup>DT</sup> Q <sup>ER</sup> KEI <sup>TE</sup> KA <sup>Q</sup> L <sup>TIF</sup> Y <sup>G</sup> GS <sup>V</sup> V <sup>FD</sup> FP--AE <sup>KA</sup> E <sup>EL</sup> MLK                                                        |

OsJAZ12 49 MQLFP PPR-----AAAADGVATPS--AGTAPLTIFYDGRMVVVDVDP--VEKAAELMR  
 OsJAZ13 43 LPLMPGADVAGDEREE---EGGGAAS SAAQM TIFYGGFVLVLDECP--ADPAAALLR  
 OsJAZ14 46 MLLMPGADVEPDVREE-----A AAAAQLKIMYGGRLVFDFFPAGGAVVELVR  
 OsJAZ15 75 VVSPAPAPAAAQERRRPEVHVT PSVPATAPTAPLTIVYGGQVLVFEHYT--AFAAEKLIVQ

AtJAZ9 145 CAGNGLKGETGDSKPVREAERMYG-----  
 OsJAZ1 99 TAAA AAAASATKSNAI AVKPPVMPAAN-----  
 OsJAZ2 67 ISMASQGNFGKQQQQIQGRDDHHYHQGESSSGGVSTAAARHCDVAGSSSSHSGSGSGS  
 OsJAZ3 233 LASRASI PSPPS-AARKSDSPI SAAAKLTVPEALPARQIVVQKPEASVPLVSGVSNPITI  
 OsJAZ4 219 LASRCSLPSAPTTVARMP EAHVFPPAKVTVPEVSP TKPMM LQKQQLVSSPVPAISKPISV  
 OsJAZ5 111 MATEAT-----  
 OsJAZ6 107 MASKSSSTAQNCVLLPSS-----  
 OsJAZ7 129 LASKSPVAPQNAAP-----  
 OsJAZ8 146 IVSTGDG-----  
 OsJAZ9 94 FASAAQ-----  
 OsJAZ10 100 MASSGM-----  
 OsJAZ11 125 LAGSRD-----  
 OsJAZ12 97 LAGS-----  
 OsJAZ13 97 LAASSR-----  
 OsJAZ14 95 AAARAG-----  
 OsJAZ15 133 RTQHLLAAAAGG-----

AtJAZ9 169 -----KQIHNTAATSSSATHTDNFSRCRDT PVAATNAMSMIESFNAAPRNMI PSVPQAR  
 OsJAZ1 128 -----ATQAAVSPVLTRSLSLQSTSVATGQPQVAADPSSICKLQADIP IAR  
 OsJAZ2 127 -----ATPPRALVSPRAGLQAAAAAPT MNQPPAASGLSM  
 OsJAZ3 292 VSQAVTLPKSFSSSND SAGPKSGGLPLAVTPLSQASPSQIPVATTNASAIMPRAMPQAR  
 OsJAZ4 279 VSQATSLPRSASS SNVDSNVTKSSGPLVVPPTSLPPPAQPETLATT TAAAIMPRAMPQAR  
 OsJAZ5 117 -----KAKGLARCN AIVGN-----FAKEPLTR  
 OsJAZ6 125 -----ATATVADNTKVS-AVPAPASALPV AQANAPKVRPNADIPQAR  
 OsJAZ7 145 -----APAAVT DNTKAPMAVPAPVSSLPTAQADAQKPARANASDMP IAR  
 OsJAZ8 153 -----VDKNTGTAA TQSLRPAHNSLPDIP IAR  
 OsJAZ9 100 -----GGGGAPEPPALVD-----MPIAR  
 OsJAZ10 106 -----AAAP---AQREGAA-----LADMPIMR  
 OsJAZ11 131 -----STAAAVSDAGAAAGQPC---LPDMP IAR  
 OsJAZ12 101 -----ACSPQPAHAAA-----LPEMPIAR  
 OsJAZ13 103 -----GVPRDDLASTAAAAGE---SADLPVAR  
 OsJAZ14 101 -----QDVRRAGAAARRRVGDSRGLDAGHPVVR  
 OsJAZ15 145 -----GGGNKNNVT VVT PPPDEPMLLPPQMPAA SGVSAGGVMPIAR

### Jas

AtJAZ9 224 KASLARFLEKRKER-----LMSAMPYKKMLLDLSTGESSG-----  
 OsJAZ1 174 RLSLQRFLEKRKDR-----LVSKAPYPTKSSEGM EASGME-----  
 OsJAZ2 163 KRSLQRFLEKRKTR-----AAAPLYARR\*-----  
 OsJAZ3 352 KASLARFLEKRKER-----VSSVAPYPSKSPLES SDTIGSPSTP-----  
 OsJAZ4 339 KASLARFLEKRKER-----VTTVAPYPLAKSPLES SDTMGSAND-----  
 OsJAZ5 139 TKS LQRFLEKRKER-----LTS LGPYQVG GPAAV GATTST-----  
 OsJAZ6 168 KASLHRFLEKRKDR-----LQAKAPYQGS PSDAS PVKKELQ-----  
 OsJAZ7 189 KASLHRFLEKRKDR-----LNAKTPYQAS PSDAT PVKKEP-----  
 OsJAZ8 181 RNSLHRFLEKRKGR-----MNANAPYQANCTAAPSKQANG-----  
 OsJAZ9 119 KASLKRFLAKRKAT-----PASARSSYVRAAAAE EEQPP-----  
 OsJAZ10 125 KASLQRFLEKRKDR-----LAAT-TPYARPSPAETKASEPEEKKTPTSWLD-----  
 OsJAZ11 157 KVS LQRFLEKRKNR-----LVVAEFLPESEKKEAESSKRA-----  
 OsJAZ12 121 KASLQRFLEKRKHR-----TTTS---EPYKKA VASPAP-----  
 OsJAZ13 127 KASLQRFLEKRKGR-----LAARCPYRR-----  
 OsJAZ14 128 KVS LQRFLEKRFRMRVYHILYIDKSSHVP GPGRYRSWQCR I IIAAVAGAGGFV VACGVL  
 OsJAZ15 189 KASLQRFLEKRKQK\*-----

AtJAZ9 259 -----MNYSTSPT\*-----  
 OsJAZ1 209 -----VTAECKAQ\*-----  
 OsJAZ2 -----  
 OsJAZ3 392 -----SKSSCTDITPSTNNCEDSLC LGQPRN ISFSSQEPSTKLQI\*-----  
 OsJAZ4 378 -----NKSSCTDIALSSN-RDESLSLGQPRT ISFCE-ESPSTKLQI\*-----  
 OsJAZ5 174 -----TTKSFLAKE-----EEHTAS\*-----

|         |     |      |              |                 |            |                 |                    |
|---------|-----|------|--------------|-----------------|------------|-----------------|--------------------|
| OsJAZ6  | 204 | ---- | ESQPWLGLGPQV | ----            | AAPDLS     | IRQESSQ*        | -----              |
| OsJAZ7  | 224 | ---- | ESQPWLGLGPNA | ----            | VVKPIERGQ* | -----           | -----              |
| OsJAZ8  | 216 | ---- | DKSWLGFGQEM  | ----            | TIKQEI*    | -----           | -----              |
| OsJAZ9  | 154 | ---- | AKKAKAAVERR  | ----            | EDWLAI     | GS LGHMHSR*     | -----              |
| OsJAZ10 | 170 | ---- | LAASASAAARR  | ----            | DSLTI      | AL*             | -----              |
| OsJAZ11 | 192 | ---- | KKDDGGASWL   | ----            | QVNPT      | LSL*            | -----              |
| OsJAZ12 | 153 | ---- | EKSFAVAPVK   | ----            | DEPATW     | GL*             | -----              |
| OsJAZ13 | 151 | ---- | HDAAAARG     | ----            | DHLAI      | AL*             | -----              |
| OsJAZ14 | 188 |      | SRCVKA       | EEAAAANGRRHHHHH | TTML       | LLMPGADVEPDVREE | AAAAAQLKIMYGGRMLVF |
| OsJAZ15 |     |      |              |                 |            |                 |                    |
| AtJAZ9  |     |      |              |                 |            |                 |                    |
| OsJAZ1  |     |      |              |                 |            |                 |                    |
| OsJAZ2  |     |      |              |                 |            |                 |                    |
| OsJAZ3  |     |      |              |                 |            |                 |                    |
| OsJAZ4  |     |      |              |                 |            |                 |                    |
| OsJAZ5  |     |      |              |                 |            |                 |                    |
| OsJAZ6  |     |      |              |                 |            |                 |                    |
| OsJAZ7  |     |      |              |                 |            |                 |                    |
| OsJAZ8  |     |      |              |                 |            |                 |                    |
| OsJAZ9  |     |      |              |                 |            |                 |                    |
| OsJAZ10 |     |      |              |                 |            |                 |                    |
| OsJAZ11 |     |      |              |                 |            |                 |                    |
| OsJAZ12 |     |      |              |                 |            |                 |                    |
| OsJAZ13 |     |      |              |                 |            |                 |                    |
| OsJAZ14 | 248 |      | DFFPAGGAVVE  | LVRAAARAGRDD    | DGARARRRP  | PAGGEEGVAAAVR   | GEEKSQAARGDGA      |
| OsJAZ15 |     |      |              |                 |            |                 |                    |
| AtJAZ9  |     |      |              |                 |            |                 |                    |
| OsJAZ1  |     |      |              |                 |            |                 |                    |
| OsJAZ2  |     |      |              |                 |            |                 |                    |
| OsJAZ3  |     |      |              |                 |            |                 |                    |
| OsJAZ4  |     |      |              |                 |            |                 |                    |
| OsJAZ5  |     |      |              |                 |            |                 |                    |
| OsJAZ6  |     |      |              |                 |            |                 |                    |
| OsJAZ7  |     |      |              |                 |            |                 |                    |
| OsJAZ8  |     |      |              |                 |            |                 |                    |
| OsJAZ9  |     |      |              |                 |            |                 |                    |
| OsJAZ10 |     |      |              |                 |            |                 |                    |
| OsJAZ11 |     |      |              |                 |            |                 |                    |
| OsJAZ12 |     |      |              |                 |            |                 |                    |
| OsJAZ13 |     |      |              |                 |            |                 |                    |
| OsJAZ14 | 308 |      | RHSP         | MPLPART         | PGSGRT     | DDAAFY*         |                    |
| OsJAZ15 |     |      |              |                 |            |                 |                    |

**Figure S1. Alignment of OsJAZ family proteins in rice**

Amino acid sequences of OsJAZ proteins in rice and AtJAZ9 were aligned using the ClustalW program. The semi-conserved domain, CMID, TIFY and Jas motif are underlined with green, blue and red lines. Black shading indicates identical residues and grey shading indicates less conserved residues.

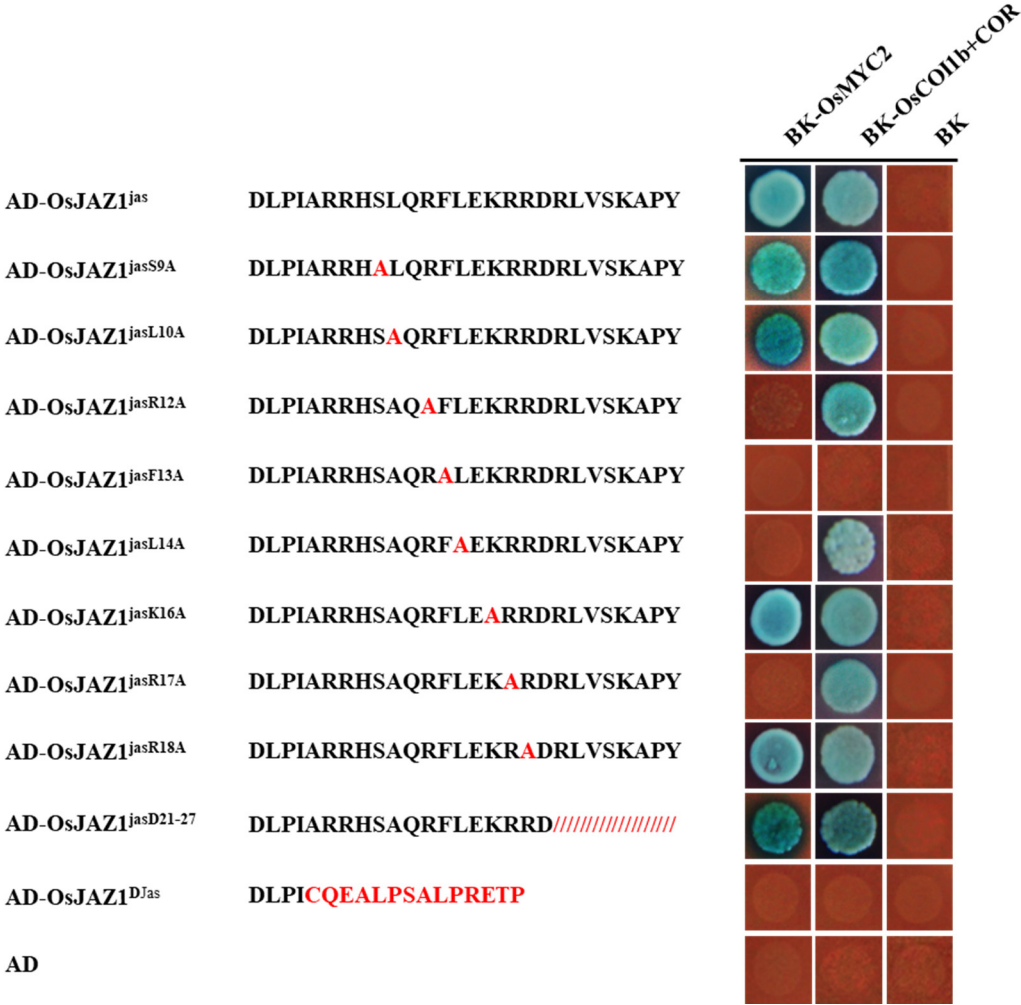

**Figure S2. Protein-protein interactions between OsJAZ1 and OsCOI1b or OsMYC2**

To detect the interaction between OsCOI1b and OsJAZ variants, 30 µM coronatine was applied in the SD -Trp/-Leu/-His/-Ade medium plates.



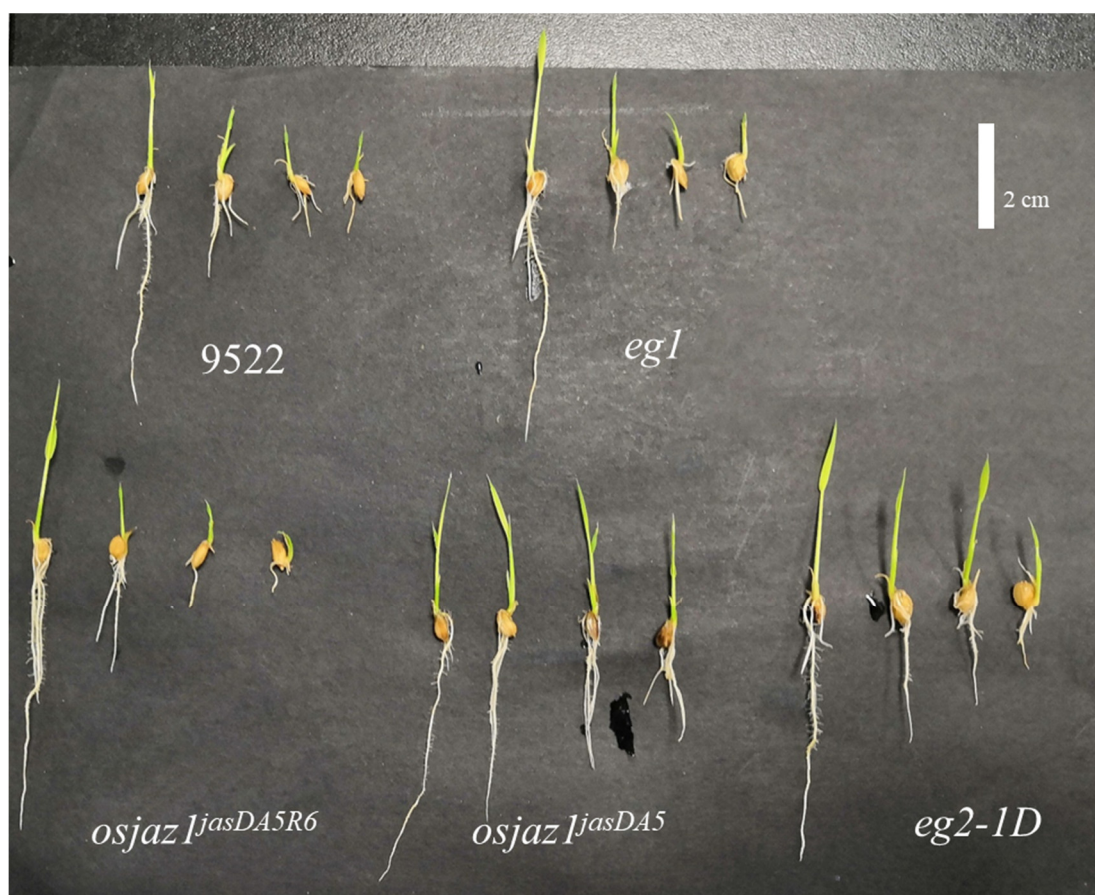

**Figure S3. Phenotypes of root growth under 0, 5, 10 or 15  $\mu$ M MeJA treatment**

All the seeds were germinated and grown for 3 days and then treated with the different concentrations of MeJA for 5 days. Note that the root length is longer in *osjazl<sup>jasDA5</sup>* and *eg2-1D* plants than in *osjazl<sup>jasDA5R6</sup>*, *egl* and wild type 9522 under higher MeJA treatment. Scale bars=2 cm.

**Table S1. Primers used in this study.**

[Click here to Download Table S1](#)
